# Supplementary material for: Air Pollution-Related Respiratory Diseases and Associated Environmental Factors in Chiang Mai, Thailand, in 2011–2020
Source: MDPI journal article supplement (doi:10.3390/tropicalmed7110341), 2022-10-31
Supplement: s1 [file s1]

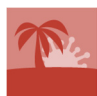

## Supplementary Materials:

# Air Pollution-Related Respiratory Diseases and Associated Environmental Factors in Chiang Mai, Thailand, in 2011–2020

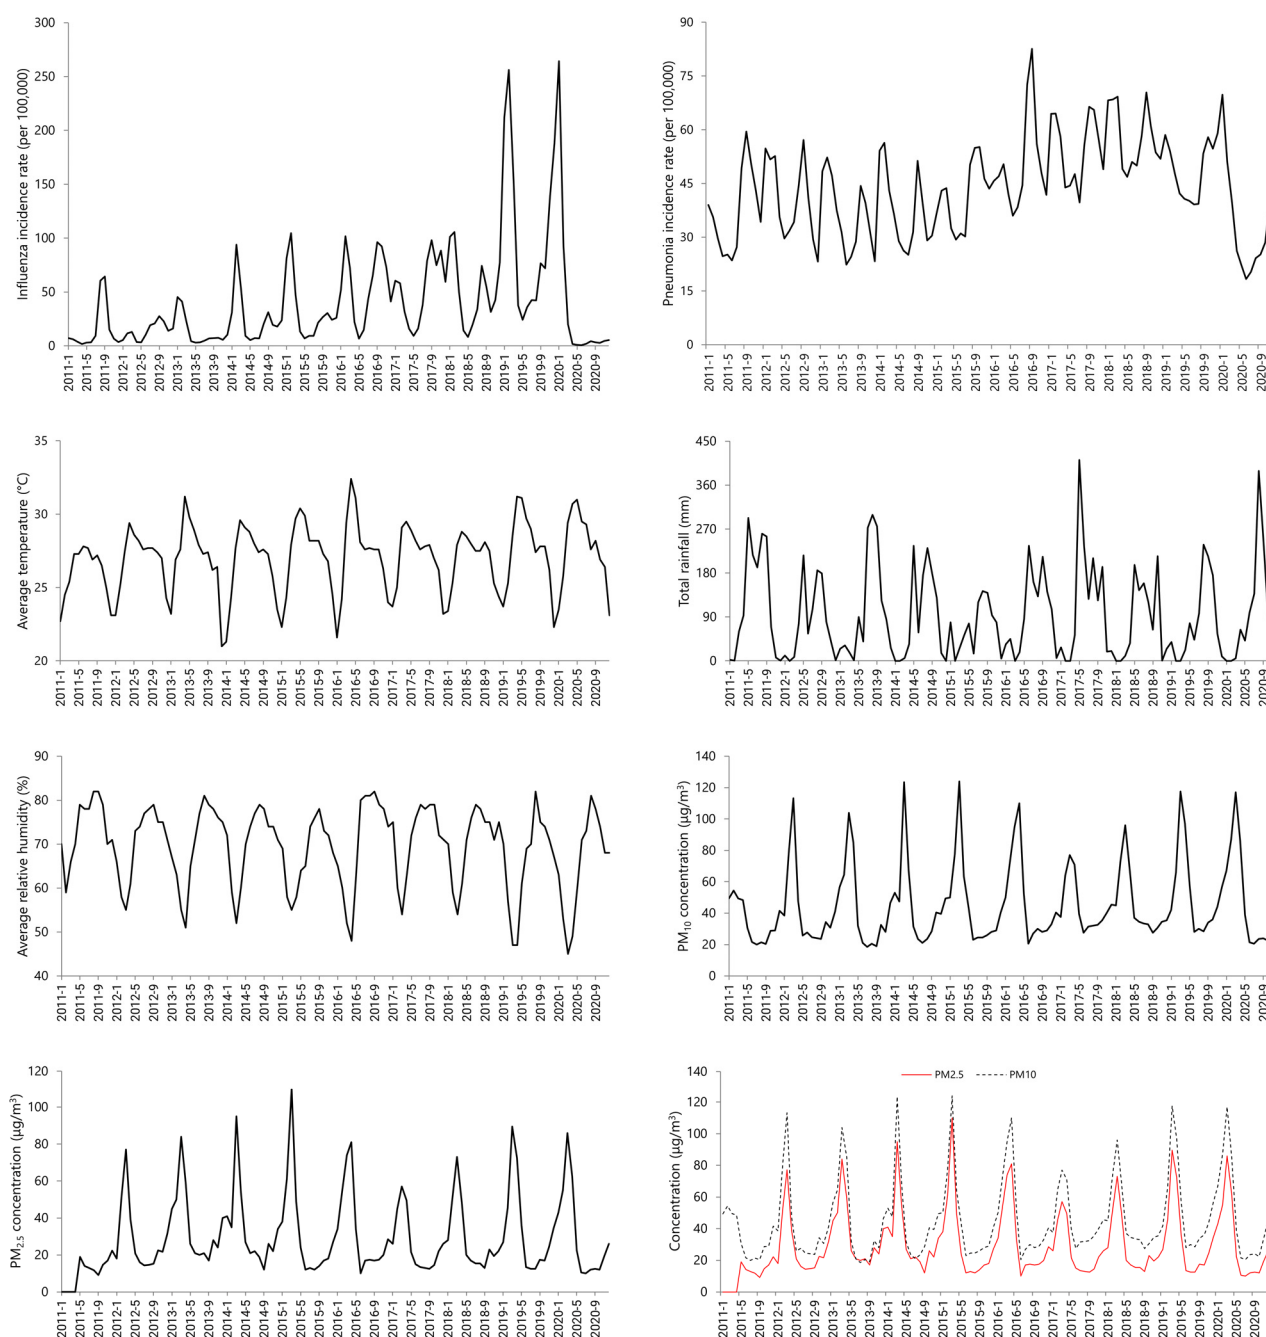

**Figure S1.** Monthly incidence of influenza and pneumonia, climate data, and concentration of air pollutants in Chiang Mai province from 2011 to 2020. (From January to April 2011, PM<sub>2.5</sub> concentration data was unavailable.)

**Table S1.** Baseline information of monthly meteorological and air pollutant data in Chiang Mai from 2011 to 2020.

| Season<br>Month                                     | Dry, Cool        |                  | Hot              |                     |                   | Rainy              |                    |                    |                    | Dry, Cool          |                    |                    |
|-----------------------------------------------------|------------------|------------------|------------------|---------------------|-------------------|--------------------|--------------------|--------------------|--------------------|--------------------|--------------------|--------------------|
|                                                     | Jan              | Feb              | Mar              | Apr                 | May               | Jun                | Jul                | Aug                | Sep                | Oct                | Nov                | Dec                |
| Temperature (°C)                                    |                  |                  |                  |                     |                   |                    |                    |                    |                    |                    |                    |                    |
| Station 1 <sup>a</sup>                              | 22.9             | 25.1             | 28.0             | 30.0                | 29.6              | 28.7               | 28.0               | 27.6               | 27.8               | 27.2               | 26.1               | 23.3               |
| Station 2 <sup>b</sup>                              | 15.9             | 18.9             | 21.5             | 22.7                | 22.1              | 20.7               | 20.0               | 19.8               | 19.9               | 18.7               | 18.0               | 15.5               |
| Mean difference ± SE                                | <b>6.9 ± 0.4</b> | <b>6.2 ± 0.4</b> | <b>6.6 ± 0.6</b> | <b>7.3 ± 0.7</b>    | <b>7.5 ± 0.6</b>  | <b>8.0 ± 0.3</b>   | <b>8.0 ± 0.2</b>   | <b>7.8 ± 0.1</b>   | <b>7.9 ± 0.1</b>   | <b>8.5 ± 0.2</b>   | <b>8.2 ± 0.3</b>   | <b>7.8 ± 0.5</b>   |
| Relative humidity (%)                               |                  |                  |                  |                     |                   |                    |                    |                    |                    |                    |                    |                    |
| Station 1                                           | 68.7             | 58.6             | 53.5             | 56.8                | 67.8              | 73.4               | 76.5               | 79.6               | 78.5               | 76.0               | 72.7               | 71.1               |
| Station 2                                           | 70.5             | 53.5             | 48.8             | 59.4                | 76.5              | 88.4               | 91.3               | 93.0               | 91.6               | 90.6               | 85.2               | 81.3               |
| Mean difference ± SE                                | -1.8 ± 3.1       | 5.1 ± 2.6        | 4.7 ± 3.1        | -2.6 ± 3.9          | <b>-8.7 ± 2.9</b> | <b>-15.0 ± 1.7</b> | <b>-14.8 ± 1.2</b> | <b>-13.4 ± 1.0</b> | <b>-13.1 ± 0.9</b> | <b>-14.6 ± 1.2</b> | <b>-12.5 ± 1.4</b> | <b>-10.2 ± 2.0</b> |
| Total precipitation (mm)<br><sup>c</sup>            |                  |                  |                  |                     |                   |                    |                    |                    |                    |                    |                    |                    |
| Station 1                                           | 21.8             | 7.8              | 13.5             | 45.2                | 172.4             | 114.4              | 154.9              | 220.9              | 189.4              | 131.5              | 40.9               | 9.4                |
| Station 2                                           | 24.7             | 21.7             | 47.4             | 87.1                | 242.0             | 178.3              | 318.9              | 375.4              | 297.1              | 195.0              | 50.5               | 24.0               |
| Mean difference ± SE                                | -2.8 ± 8.5       | -13.9 ± 12.5     | -33.9 ± 16.9     | <b>-41.9 ± 18.0</b> | -69.6 ± 50.7      | -63.9 ± 36.1       | <b>-164 ± 40.0</b> | <b>-154 ± 41.3</b> | <b>-108 ± 38.6</b> | -63.5 ± 43.0       | -9.6 ± 15.0        | -14.6 ± 8.8        |
| PM <sub>2.5</sub> (µg/m <sup>3</sup> ) <sup>d</sup> |                  |                  |                  |                     |                   |                    |                    |                    |                    |                    |                    |                    |
| Station 1                                           | 33.3             | 51.5             | 81.0             | 62.3                | 26.5              | 15.0               | 15.6               | 16.4               | 17.0               | 19.0               | 23.8               | 30.6               |
| Station 2                                           | 32.3             | 48.7             | 80.8             | 55.5                | 24.5              | 14.6               | 14.1               | 13.8               | 12.7               | 17.6               | 19.5               | 27.6               |
| Mean difference ± SE                                | 0.9 ± 5.6        | 2.8 ± 4.2        | 0.2 ± 9.6        | 6.8 ± 7.7           | 2.0 ± 3.8         | 0.4 ± 2.4          | 1.5 ± 2.2          | 2.7 ± 1.9          | <b>4.3 ± 1.5</b>   | 1.4 ± 3.1          | 4.3 ± 1.4          | 3.0 ± 3.4          |
| PM <sub>10</sub> (µg/m <sup>3</sup> )               |                  |                  |                  |                     |                   |                    |                    |                    |                    |                    |                    |                    |
| Station 1                                           | 48.9             | 69.6             | 104.6            | 77.6                | 40.2              | 23.3               | 23.8               | 25.0               | 25.4               | 30.7               | 33.0               | 44.0               |
| Station 2                                           | 48.9             | 67.6             | 98.8             | 71.1                | 37.5              | 26.4               | 26.4               | 27.2               | 27.3               | 32.9               | 35.3               | 44.6               |
| Mean difference ± SE                                | 0.0 ± 4.4        | 2.0 ± 6.0        | 5.8 ± 11.2       | 6.4 ± 9.7           | 2.7 ± 5.0         | -3.1 ± 2.5         | -2.6 ± 2.6         | -2.3 ± 2.4         | -1.9 ± 2.7         | -2.2 ± 2.8         | -2.3 ± 3.0         | -0.6 ± 3.2         |

<sup>a</sup> Station 1, weather station#327501 (meteorological data) or air quality monitoring station#35T (PM<sub>2.5</sub> and PM<sub>10</sub> data). <sup>b</sup> Station 2, weather station#327202 or air quality monitoring station#36T. <sup>c</sup> Total precipitation in Thailand only refers to total rainfall. <sup>d</sup> From January to April of 2011, PM<sub>2.5</sub> data was unavailable, and from 2011 to June of 2016, data was only retrieved from a 36T station. Values in bold were indicated significantly difference between two stations ( $p$ -value < 0.05). Due to significant different of the meteorological data between two stations, only the data from station#327501 were used in this study.

**Table S2.** Details of district hospitals/health service centers in health service network of air pollution-related illness.

| District   | Hospital/Health Service Center                 | Decimal Degree |           | UTM Coordinates |             |
|------------|------------------------------------------------|----------------|-----------|-----------------|-------------|
|            |                                                | Latitude       | Longitude | X               | Y           |
| Muang      | Central Chiangmai Memorial Hospital            | 18.773001      | 98.998464 | 499838.118      | 2075710.821 |
|            | Changpuek Hospital                             | 18.799122      | 98.986928 | 498622.531      | 2078601.035 |
|            | Chiangmai Klaimor Hospital                     | 18.760717      | 98.972118 | 497061.253      | 2074351.887 |
|            | Chiangmai Medical Center Hospital              | 18.780418      | 98.988318 | 498768.867      | 2076531.515 |
|            | Fort Kawila Hospital                           | 18.777927      | 99.014745 | 501553.957      | 2076255.922 |
|            | Maharaj Nakorn Chiang Mai Hospital             | 18.789854      | 98.974354 | 497297.391      | 2077575.718 |
|            | Municipal Hospital                             | 18.788495      | 99.001807 | 500190.426      | 2077425.158 |
|            | Nong Pa Khrang Municipal Health Service Center | 18.786313      | 99.033687 | 503550.055      | 2077184.065 |
|            | Siamrad Chiangmai Hospital                     | 18.810737      | 98.981411 | 498041.308      | 2079886.234 |
| Chom Thong | Chomthong Hospital                             | 18.406576      | 98.674273 | 465597.423      | 2035199.359 |
| Mae Chaem  | Mae Chaem Hospital                             | 18.498260      | 98.365150 | 432983.290      | 2045430.322 |
| Chiang Dao | Chiang Dao Hospital                            | 19.404025      | 98.974549 | 497327.816      | 2145533.105 |
| Doi Saket  | Doi Saket Hospital                             | 18.868295      | 99.128654 | 513551.446      | 2086259.608 |
| Mae Taeng  | Mae Taeng Hospital                             | 19.137169      | 98.960362 | 495831.535      | 2116005.484 |
| Mae Rim    | Nakornping Hospital                            | 18.851413      | 98.966402 | 496460.687      | 2084387.095 |
| Samoeng    | Samoeng Hospital                               | 18.846905      | 98.732530 | 471823.085      | 2083909.213 |
| Fang       | Fang Hospital                                  | 19.913784      | 99.206226 | 521584.074      | 2201953.921 |
| Mae Ai     | Mae Ai Hospital                                | 20.038933      | 99.302212 | 531605.288      | 2215818.205 |
| Phrao      | Phrao Hospital                                 | 19.367586      | 99.200052 | 521008.819      | 2141513.006 |

|                 |                            |           |           |            |             |
|-----------------|----------------------------|-----------|-----------|------------|-------------|
| San Pa Tong     | San Pa Tong Hospital       | 18.595356 | 98.885024 | 487869.832 | 2056059.339 |
| San Kamphaeng   | San Kamphaeng Hospital     | 18.716174 | 99.122054 | 512867.801 | 2069427.608 |
| San Sai         | Sansai Hospital            | 18.920922 | 98.994147 | 499383.682 | 2092077.693 |
| Hang Dong       | Hang Dong Hospital         | 18.683074 | 98.918362 | 491391.471 | 2065762.851 |
| Hod             | Hod Hospital               | 18.179120 | 98.611242 | 458886.555 | 2010046.383 |
| Doi Tao         | Doi Tao Hospital           | 17.950273 | 98.690729 | 467250.467 | 1984711.195 |
| Omkoï           | Omkoï Hospital             | 17.802557 | 98.361002 | 432277.965 | 1968456.899 |
| Saraphi         | Sarapee Hospital           | 18.680880 | 99.043184 | 504553.706 | 2065518.683 |
| Wiang Haeng     | Wiang Haeng Hospital       | 19.560225 | 98.635756 | 461793.278 | 2162857.662 |
| Chai Prakan     | Chai Prakan Hospital       | 19.705471 | 99.136848 | 514341.463 | 2178895.040 |
| Mae Wang        | Mae Wang Hospital          | 18.615488 | 98.773641 | 476121.502 | 2058297.983 |
| Mae On          | Mae On Hospital            | 18.744628 | 99.221096 | 523305.645 | 2072585.942 |
| Doi Lo          | Doi Lo Hospital            | 18.477639 | 98.780191 | 476793.849 | 2043045.085 |
| Kalayaniwattana | Watchan Community Hospital | 19.077636 | 98.315840 | 428024.341 | 2109558.200 |

**Table S3.** Incidence rates of influenza and pneumonia in Chiang Mai from 2011 to 2020.

| Month  | Incidence Rate of Influenza (per 100,000 Population) |       |       |       |       |       |       |       |         |       |
|--------|------------------------------------------------------|-------|-------|-------|-------|-------|-------|-------|---------|-------|
|        | 2011                                                 | 2012  | 2013  | 2014  | 2015  | 2016  | 2017  | 2018  | 2019    | 2020  |
| Jan    | 7.2                                                  | 5.3   | 45.5  | 30.9  | 81.3  | 51.8  | 60.4  | 101.2 | 212.0   | 264.2 |
| Feb    | 6.2                                                  | 11.6  | 41.3  | 94.1  | 104.7 | 101.7 | 58.2  | 105.7 | 256.3   | 92.3  |
| Mar    | 4.0                                                  | 13.0  | 21.9  | 54.1  | 47.1  | 72.6  | 31.6  | 50.4  | 153.0   | 20.0  |
| Apr    | 1.8                                                  | 3.5   | 4.3   | 9.3   | 13.2  | 22.1  | 15.9  | 14.4  | 37.6    | 1.9   |
| May    | 3.0                                                  | 3.3   | 3.1   | 5.4   | 6.9   | 6.6   | 9.4   | 8.4   | 24.3    | 1.1   |
| Jun    | 3.2                                                  | 10.2  | 3.3   | 7.2   | 9.2   | 14.7  | 16.1  | 19.5  | 36.1    | 0.7   |
| Jul    | 9.3                                                  | 19.3  | 4.8   | 6.9   | 9.4   | 43.8  | 37.8  | 33.9  | 42.4    | 2.1   |
| Aug    | 60.4                                                 | 20.9  | 7.0   | 20.5  | 21.6  | 65.1  | 79.1  | 74.2  | 42.3    | 4.4   |
| Sep    | 64.5                                                 | 27.6  | 7.2   | 31.3  | 26.9  | 96.4  | 98.2  | 55.2  | 76.7    | 3.2   |
| Oct    | 15.2                                                 | 23.0  | 7.5   | 19.5  | 30.6  | 92.3  | 74.8  | 31.5  | 72.0    | 2.9   |
| Nov    | 6.8                                                  | 14.1  | 5.7   | 17.9  | 24.1  | 73.4  | 88.4  | 42.4  | 137.9   | 4.7   |
| Dec    | 3.7                                                  | 16.2  | 10.3  | 23.6  | 26.1  | 41.1  | 59.4  | 77.5  | 188.3   | 5.4   |
| Annual | 185.2                                                | 168.1 | 161.6 | 320.6 | 401.1 | 681.7 | 629.4 | 614.4 | 1,278.8 | 402.6 |
| Month  | Incidence Rate of Pneumonia (per 100,000 Population) |       |       |       |       |       |       |       |         |       |
|        | 2011                                                 | 2012  | 2013  | 2014  | 2015  | 2016  | 2017  | 2018  | 2019    | 2020  |
| Jan    | 39.0                                                 | 54.8  | 48.4  | 54.2  | 36.9  | 45.7  | 64.4  | 68.2  | 58.6    | 69.8  |
| Feb    | 35.6                                                 | 51.7  | 52.2  | 56.4  | 43.0  | 47.0  | 64.5  | 68.5  | 54.0    | 51.1  |
| Mar    | 29.6                                                 | 52.7  | 47.1  | 43.0  | 43.7  | 50.4  | 58.1  | 69.2  | 47.8    | 39.7  |
| Apr    | 24.7                                                 | 35.6  | 37.4  | 36.5  | 32.5  | 42.1  | 43.9  | 49.1  | 42.2    | 26.2  |
| May    | 25.2                                                 | 29.7  | 31.4  | 28.9  | 29.4  | 36.0  | 44.4  | 46.9  | 40.7    | 22.2  |
| Jun    | 23.6                                                 | 31.7  | 22.3  | 26.2  | 31.1  | 38.3  | 47.6  | 51.0  | 40.1    | 18.3  |
| Jul    | 27.2                                                 | 34.2  | 24.6  | 25.1  | 30.2  | 44.5  | 39.7  | 50.0  | 39.2    | 20.3  |
| Aug    | 49.3                                                 | 44.5  | 28.8  | 31.4  | 50.3  | 72.6  | 55.9  | 58.1  | 39.3    | 24.1  |
| Sep    | 59.5                                                 | 57.1  | 44.4  | 51.4  | 55.0  | 82.6  | 66.4  | 70.4  | 53.3    | 25.2  |
| Oct    | 50.6                                                 | 41.1  | 39.5  | 40.1  | 55.2  | 56.1  | 65.6  | 60.9  | 57.9    | 28.6  |
| Nov    | 42.9                                                 | 29.4  | 31.7  | 29.1  | 46.3  | 47.8  | 57.1  | 53.7  | 54.7    | 40.1  |
| Dec    | 34.3                                                 | 23.2  | 23.3  | 30.4  | 43.6  | 41.9  | 49.0  | 51.9  | 59.0    | 38.9  |
| Annual | 441.4                                                | 485.7 | 431.2 | 452.7 | 496.9 | 605.0 | 656.7 | 697.8 | 586.9   | 404.6 |
